# Supplementary material
Source: PubMed Central journal article supplement (PMC3073447)
Supplement: NIHMS276400-supplement-01.pdf [file NIHMS276400-supplement-01.pdf]

## SUPPLEMENTARY MATERIAL

## SUPP FIGURE 1

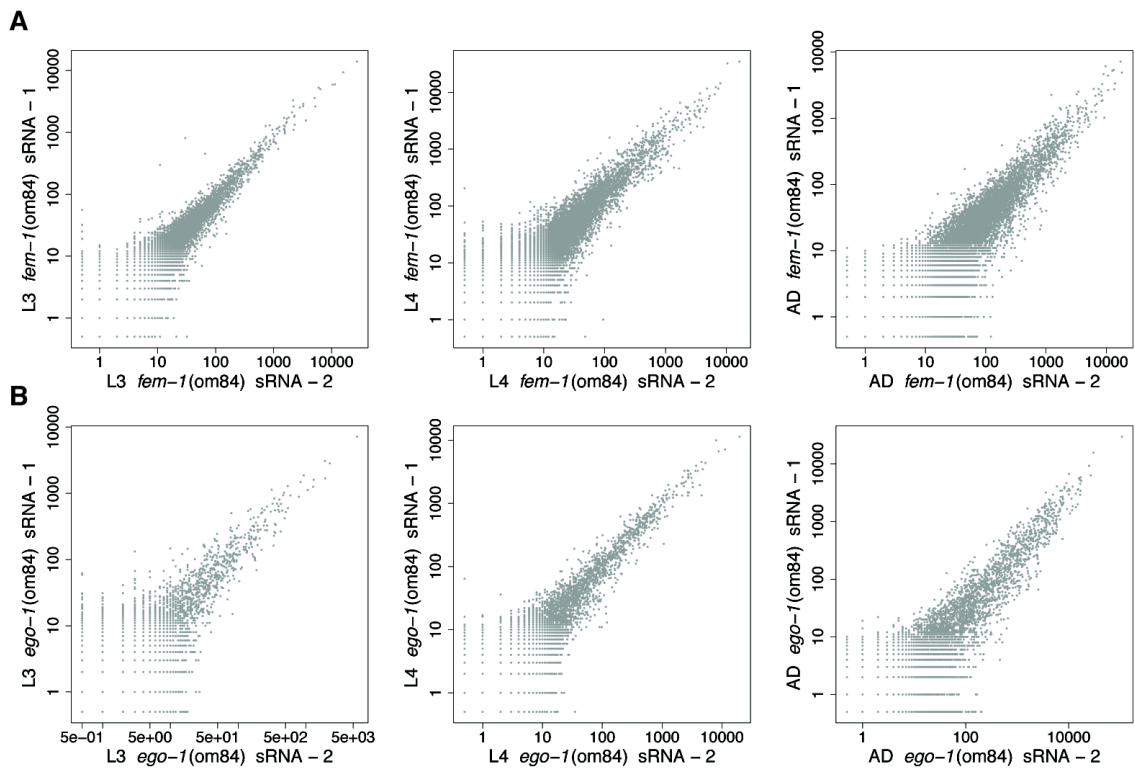

**Supplementary Figure 1.** Scatter plots depict a gene-by-gene comparison of small RNA abundance for equivalent stage and genotype. **(A)** *fem-1(hc17)*. **(B)** *ego-1(om84); fem-1(hc17)*.

SUPP FIGURE 2

**A**

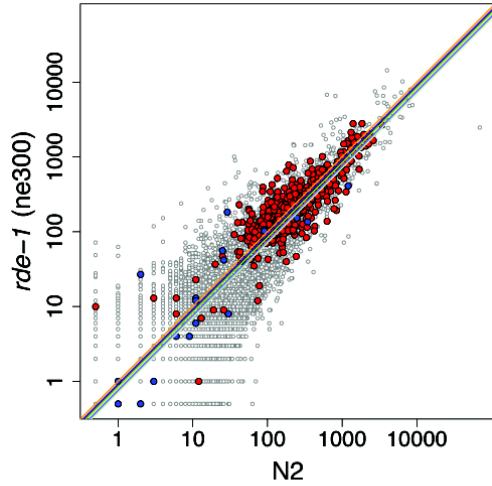

**B**

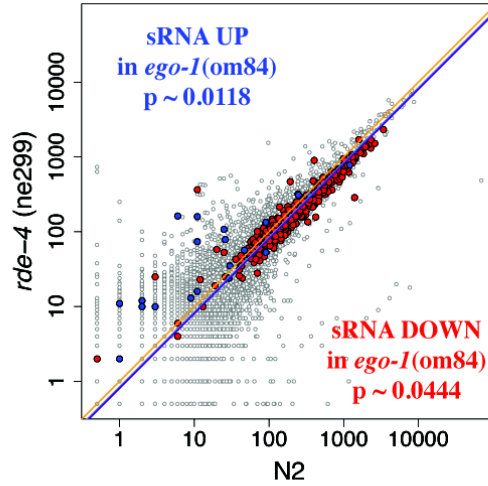

**C**

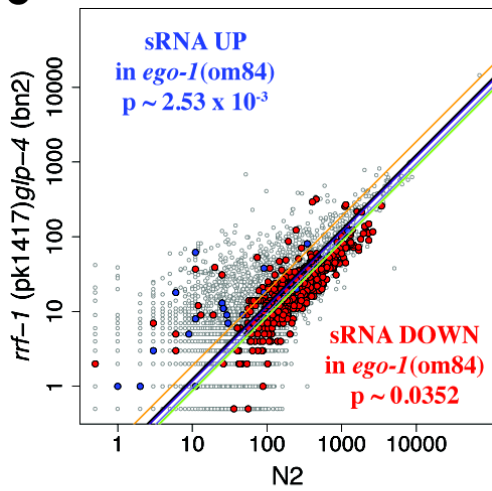

**D**

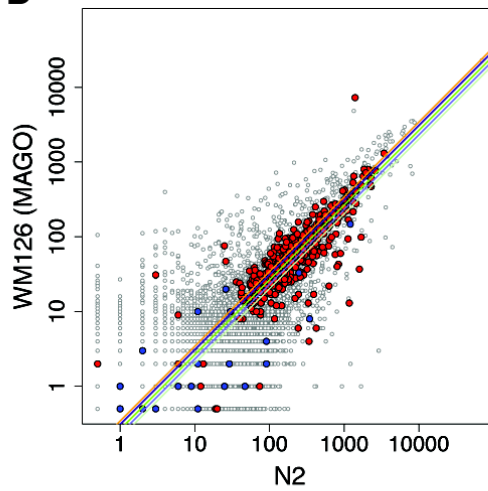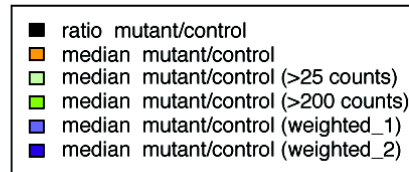

SUPP FIGURE 2 (cont.)

**E**

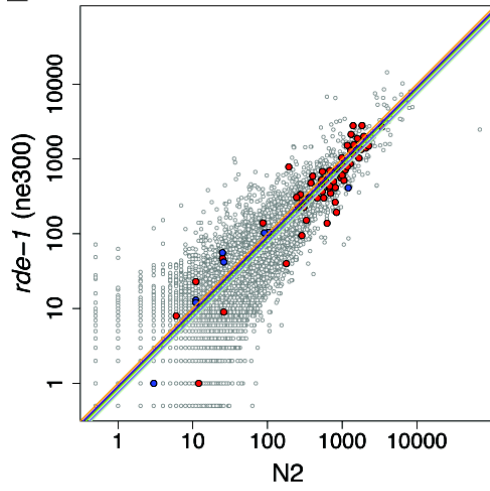

**F**

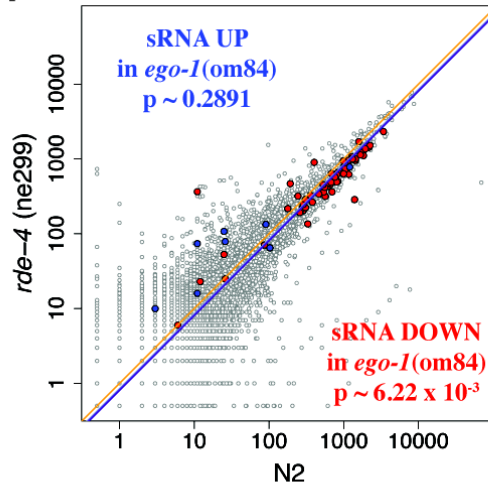

**G**

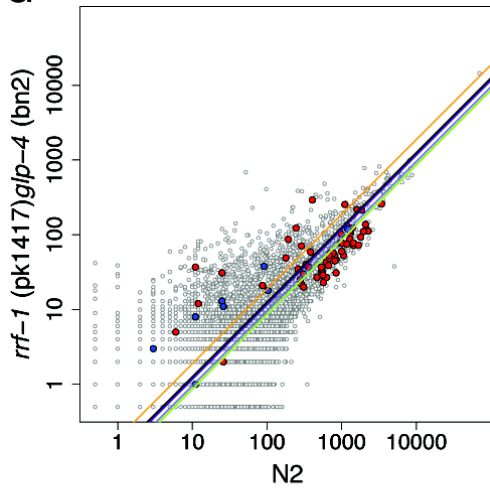

**H**

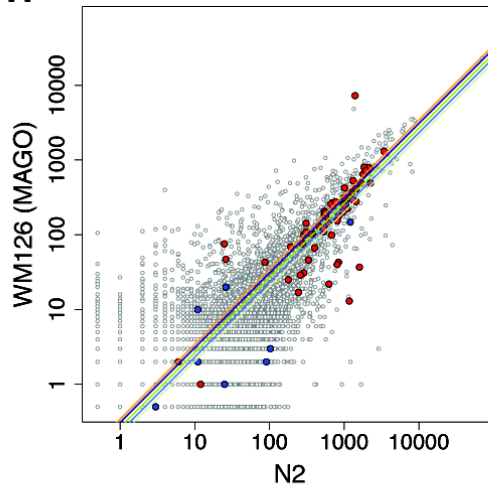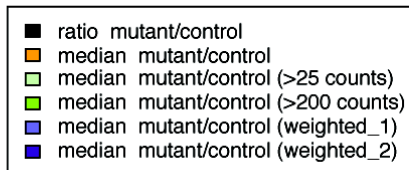

SUPP FIGURE 2 (cont.)

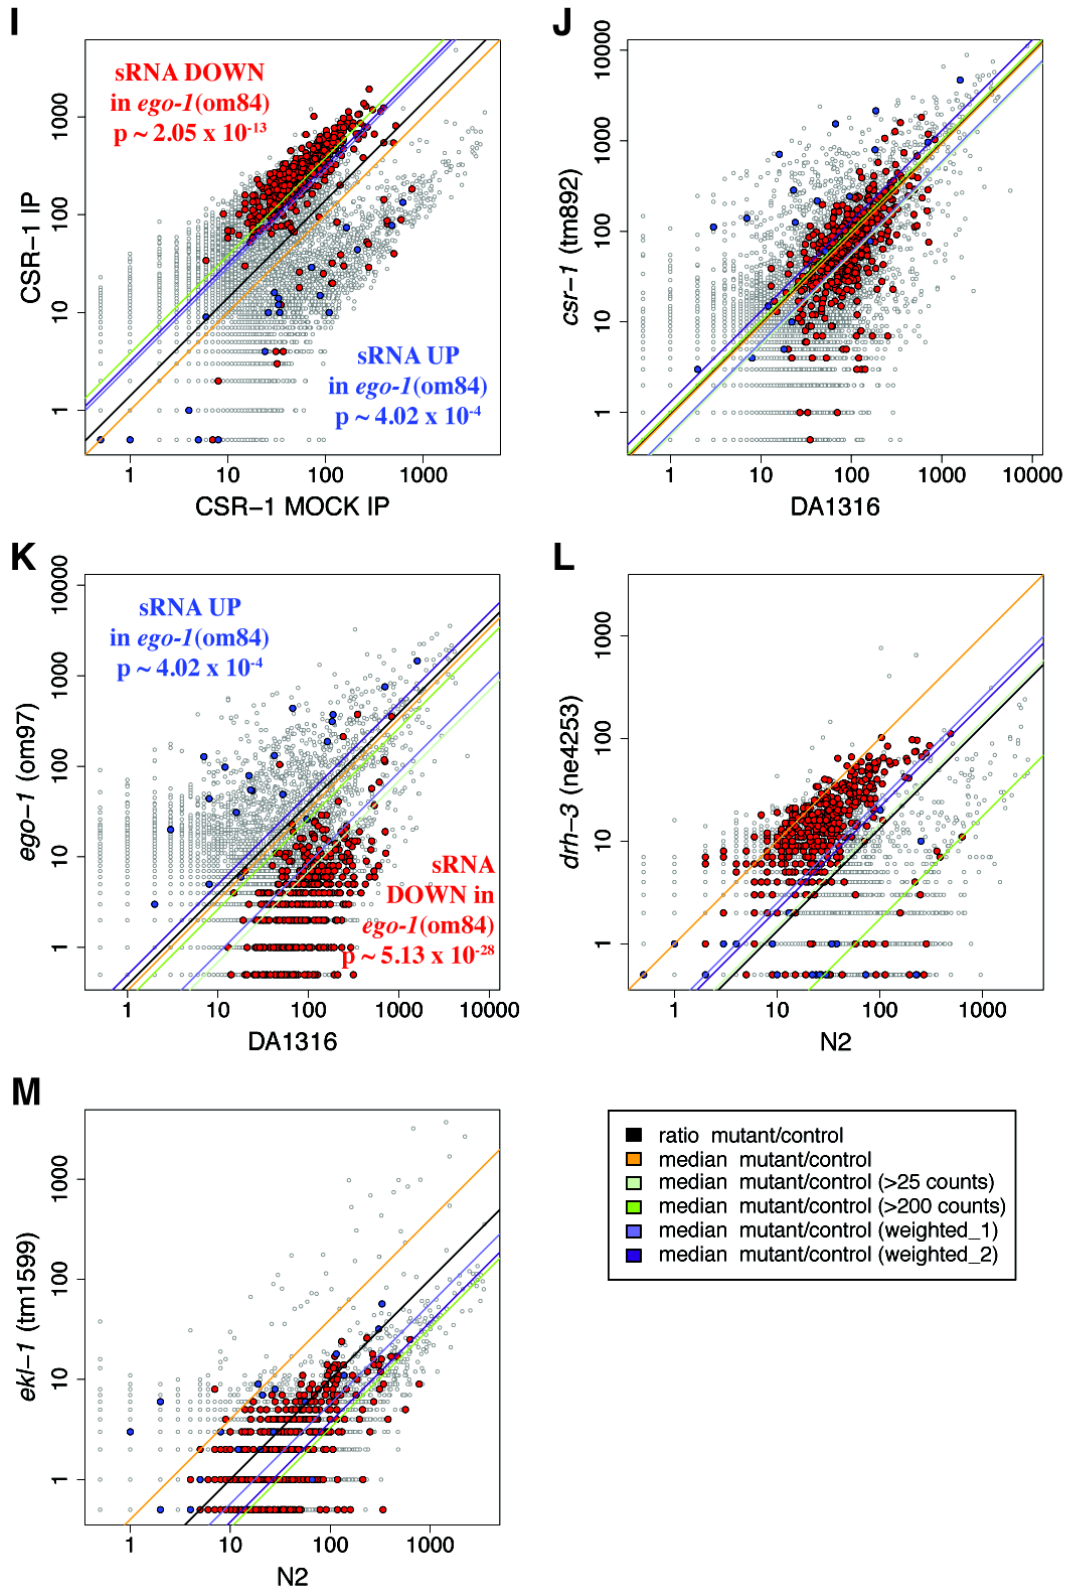

SUPP FIGURE 2 (cont.)

**N**

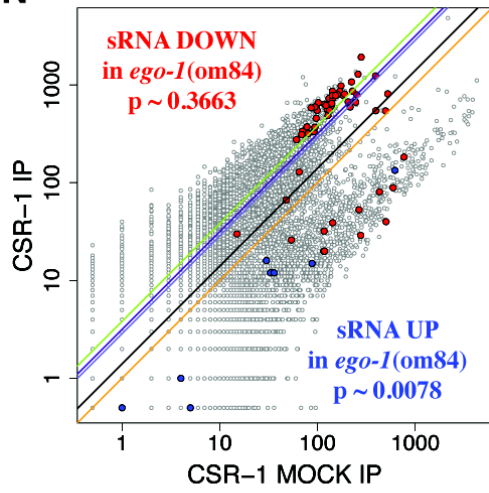

**O**

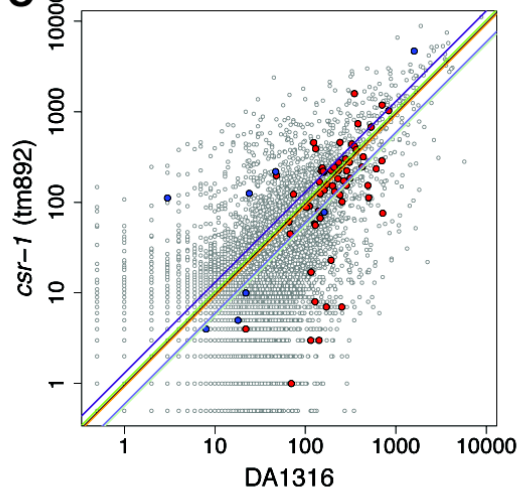

**P**

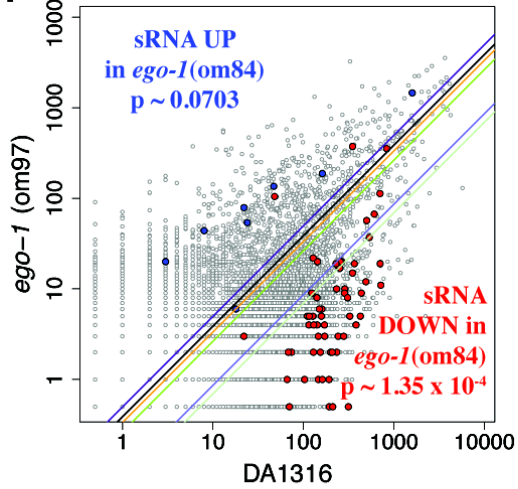

**Q**

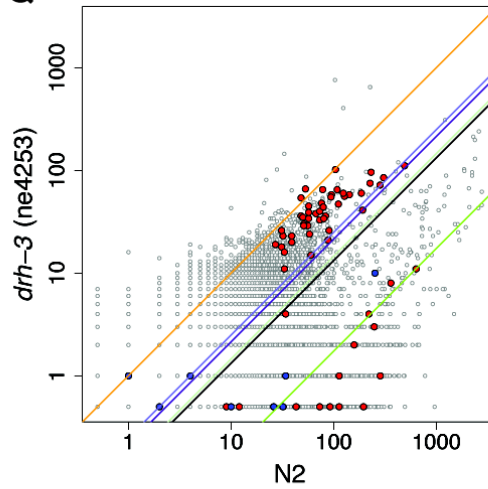

**R**

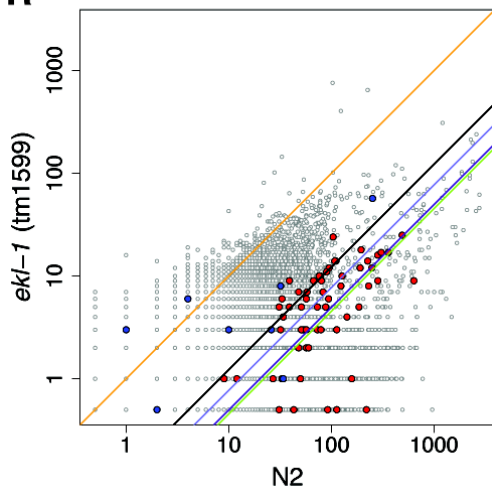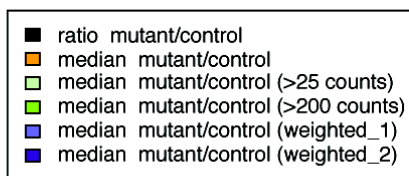

SUPP FIGURE 2 (cont.)

**S**

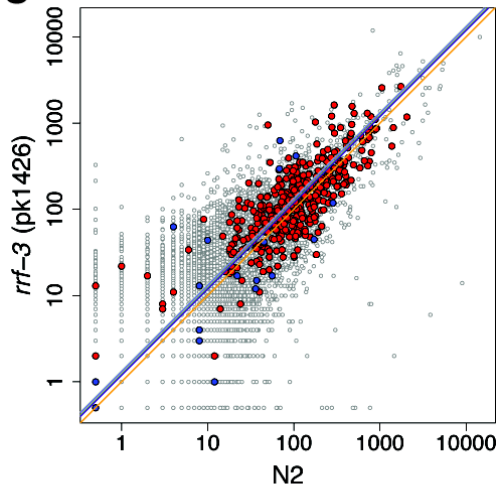

**T**

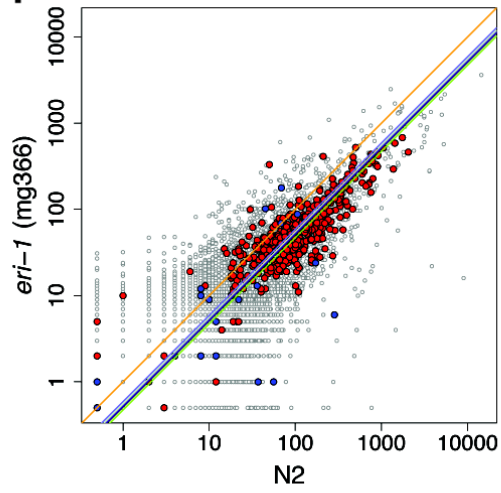

**U**

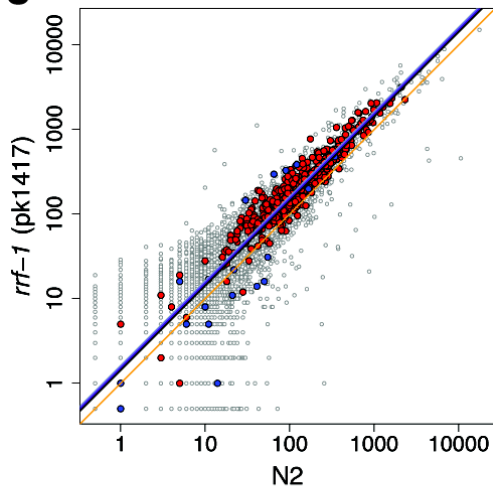

**V**

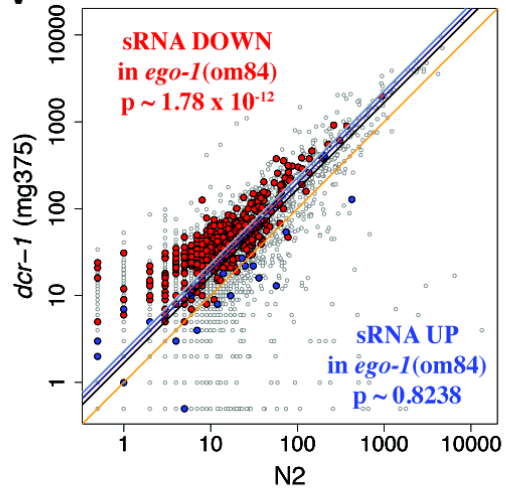

**W**

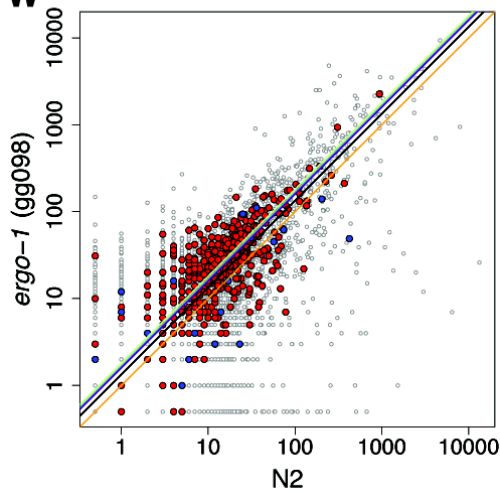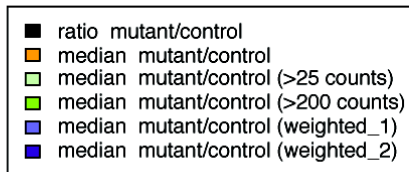

SUPP FIGURE 2 (cont.)

X

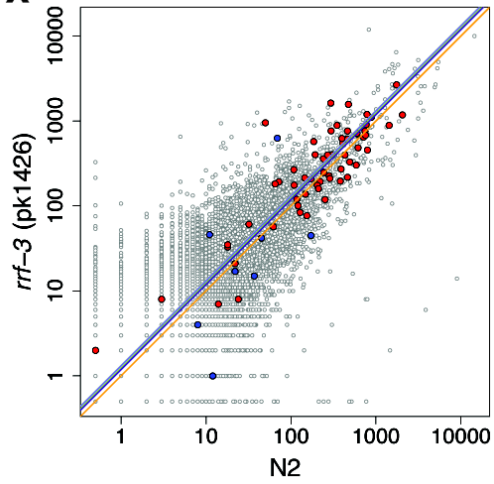

Y

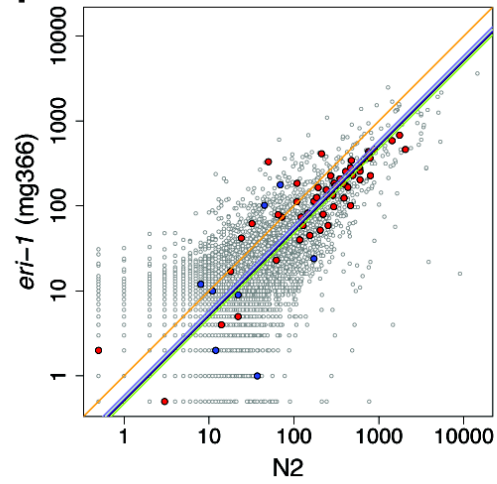

Z

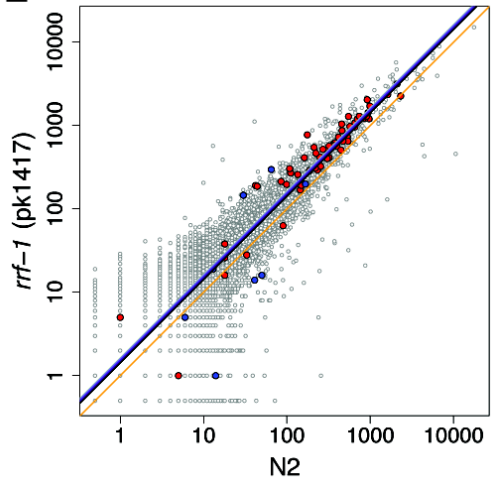

AA

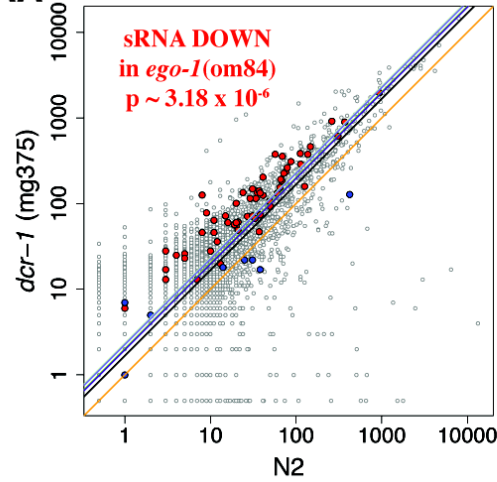

AB

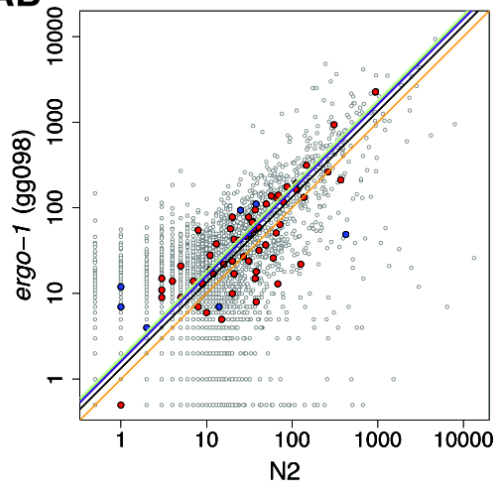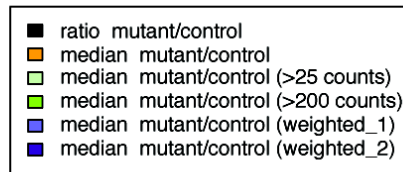

## Supplementary Figure 2. Genetic requirements for EGO-1 target accumulation.

Scatter plots depict a gene-by-gene comparison of small RNA abundance for several RNAi-related genes. Highlighted are genes whose 5'-independent sRNA abundance is down in L4/adult (and L3/L4/adult) *ego-1(om84)* (sRNA DOWN, red) and genes whose 5'-independent sRNA abundance is up in L4/adult (L3/L4/adult) *ego-1(om84)* (sRNA UP, blue). We determined a series of median ratios (see Methods) and used the most conservative in each case to calculate p-values based on the location of red and blue points relative to those medians. **(A)** L4/AD: *rde-1(ne300)*. No significant shift. **(B)** L4/AD: *rde-4(ne299)*. 240 of 437 sRNA DOWN genes fall below the lowest median ratio (p-value ~ 0.05) and 16 of 20 sRNA UP genes fall above the highest median ratio (p-value ~ 0.02). **(C)** L4/AD: *rrf-1(pk1417) glp-4(bn2)*. 241 of 437 sRNA DOWN genes fall below the lowest median ratio (p-value ~ 0.04) and 17 of 20 sRNA UP genes fall above the highest median ratio (p-value ~  $2.53 \times 10^{-3}$ ). **(D)** L4/AD: WM126 (MAGO). No significant shift. **(E)** L3/L4/AD: *rde-1(ne300)*. No significant shift. **(F)** L3/L4/AD: *rde-4(ne299)*. 41 of 60 sRNA DOWN genes fall below the lowest median ratio (p-value ~  $6.22 \times 10^{-3}$ ) and 6 of 8 sRNA UP genes fall above the highest median ratio (p-value ~ 0.2891). **(G)** L3/L4/AD: *rrf-1(pk1417) glp-4(bn2)*. No significant shift. **(H)** L3/L4/AD: WM126 (MAGO). No significant shift. **(I)** L4/AD: CSR-1:IP. We found that 295 of 437 sRNA DOWN genes are enriched in CSR-1 complexes (p-value ~  $2.05 \times 10^{-13}$ ) and 18 of 20 sRNA UP genes (p-value ~  $4.02 \times 10^{-4}$ ) fall below the lowest median value in CSR-1:IP sequencing data. **(J)** L4/AD: *csr-1(tm892)*. No significant shift. **(K)** L4/AD: *ego-1(om97)*. We found that 331 of 437 L4/adult EGO-1 targets (red) found in *ego-1(om84)* fall below the lowest median ratio (p-value ~  $5.13 \times 10^{-28}$ ) and 18 of 20 genes whose



sRNA counts increase significantly in *ego-1(om84)* (blue) fall above the greatest median ratio in *ego-1(om97)* (p-value  $\sim 4.02 \times 10^{-4}$ ). **(L)** L4/AD: *drh-3(ne4253)*. No significant shift. **(M)** L4/AD: *ekl-1(tm1599)*. No significant shift. **(N)** L3/L4/AD: CSR-1:IP. We found that 34 of 60 sRNA DOWN genes are enriched in CSR-1 complexes (p-value  $\sim 0.3663$ ) and 8 of 8 sRNA UP genes (p-value  $\sim 0.0078$ ) fall below the lowest median value in CSR-1:IP sequencing data. **(O)** L3/L4/AD: *csr-1(tm892)*. No significant shift. **(P)** L3/L4/AD: *ego-1(om97)*. We found that 45 of 60 L3/L4/adult EGO-1 targets (red) found in *ego-1(om84)* fall below the lowest median ratio (p-value  $\sim 1.35 \times 10^{-4}$ ) and 7 of 8 genes whose sRNA counts increase significantly in *ego-1(om84)* (blue) fall above the greatest median ratio in *ego-1(om97)* (p-value  $\sim 0.0703$ ). **(Q)** L3/L4/AD: *drh-3(ne4253)*. No significant shift. **(R)** L3/L4/AD: *ekl-1(tm1599)*. No significant shift. **(S)** L4/AD: *rrf-3(pk1426)*. No significant shift. **(T)** L4/AD: *eri-1(mg366)*. No significant shift. **(U)** L4/AD: *rrf-1(pk1417)*. No significant shift. **(V)** L4/AD: *dcr-1(mg375)*. 292 of 437 sRNA DOWN genes fall above the highest median ratio (p-value  $\sim 1.79 \times 10^{-12}$ ). **(W)** L4/AD: *ergo-1(gg098)*. No significant shift. **(X)** L3/L4/AD: *rrf-3(pk1426)*. No significant shift. **(Y)** L3/L4/AD: *eri-1(mg366)*. No significant shift. **(Z)** L3/L4/AD: *rrf-1(pk1417)*. No significant shift. **(AA)** L3/L4/AD: *dcr-1(mg375)*. 48 of 60 sRNA DOWN genes fall above the highest median ratio (p-value  $\sim 3.18 \times 10^{-6}$ ). **(AB)** L3/L4/AD: *ergo-1(gg098)*. No significant shift.

### SUPP FIGURE 3

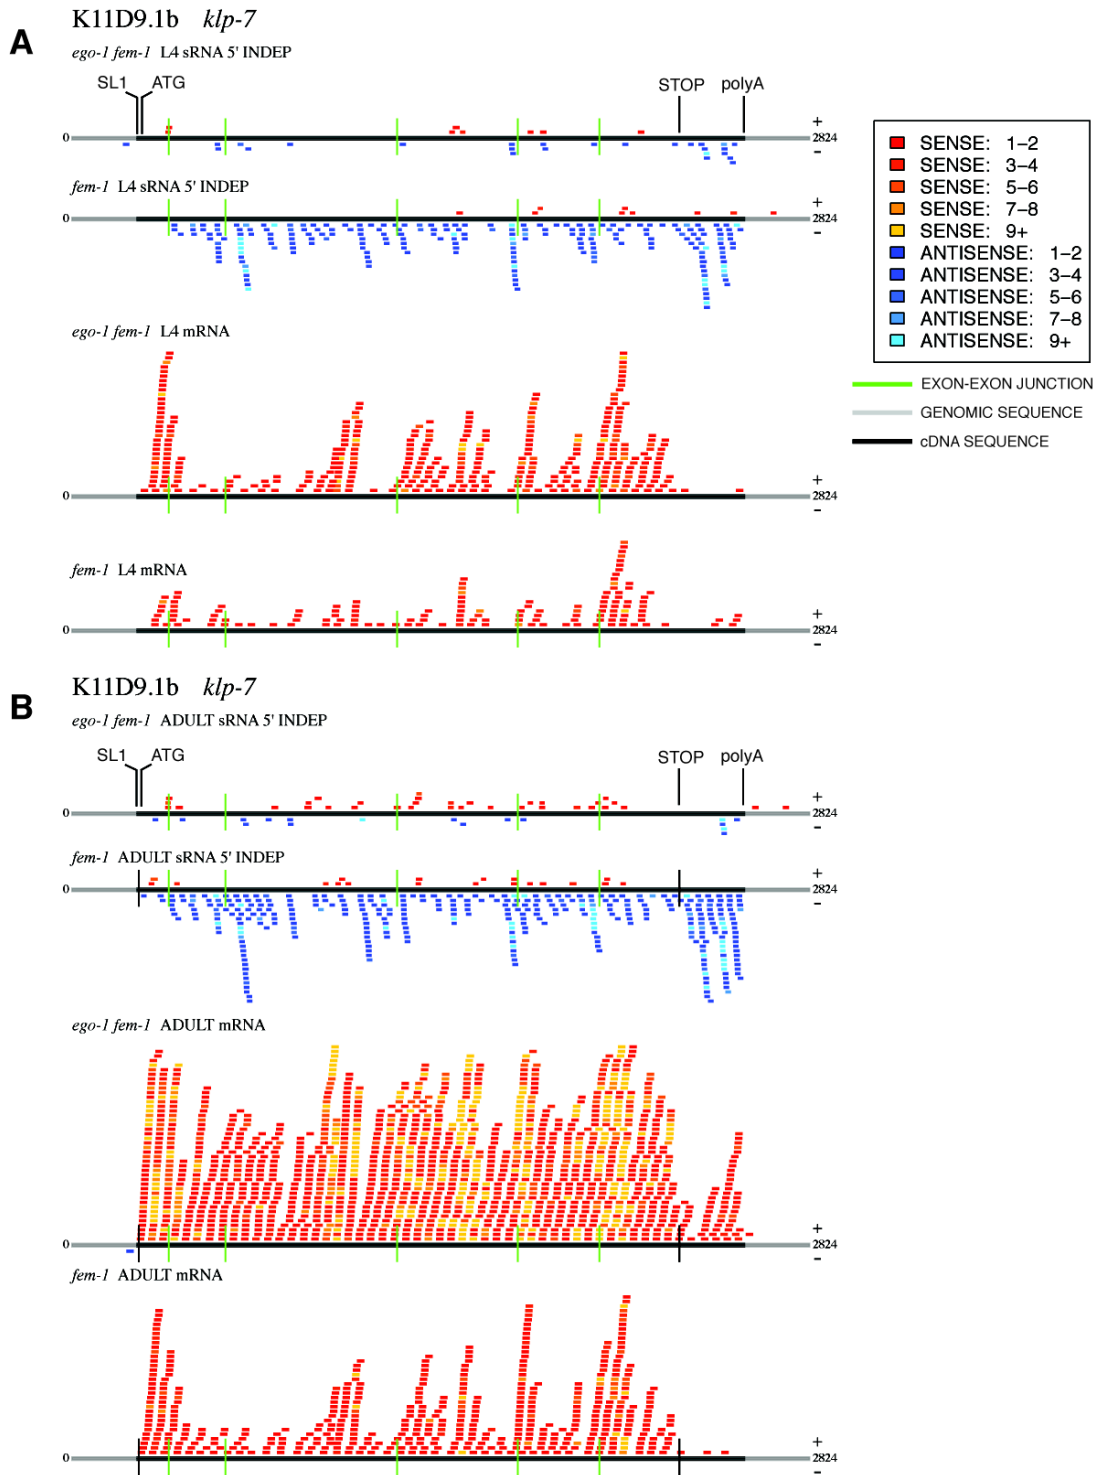

## SUPP FIGURE 3 (cont.)

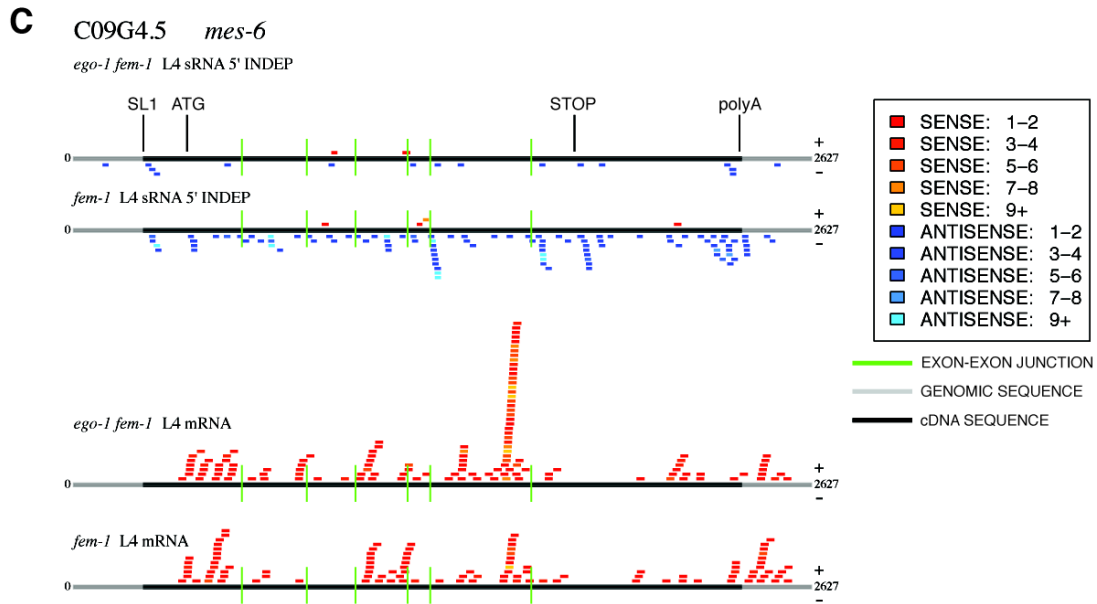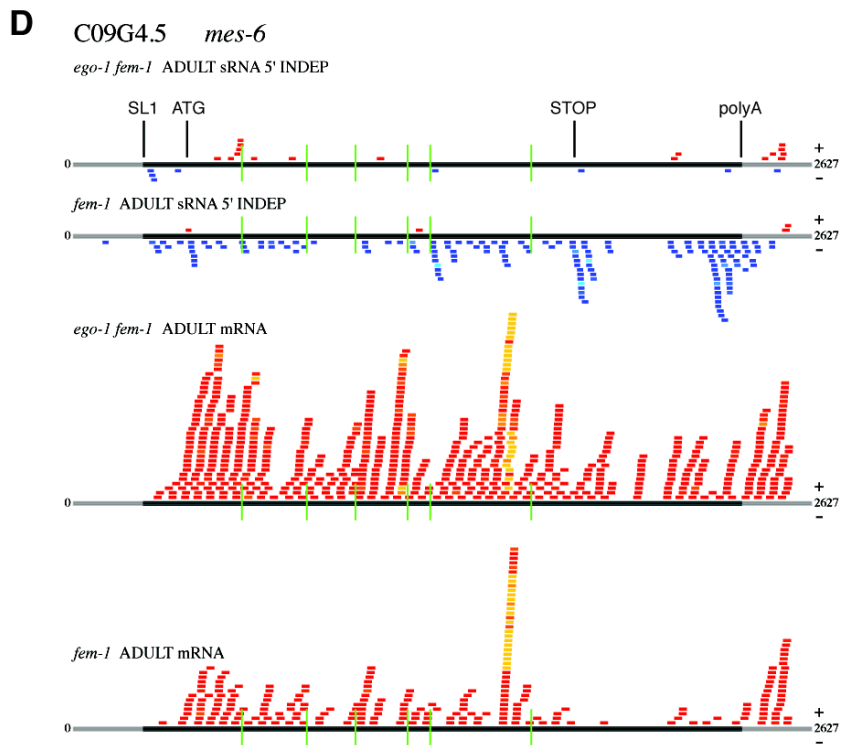

## SUPP FIGURE 3 (cont.)

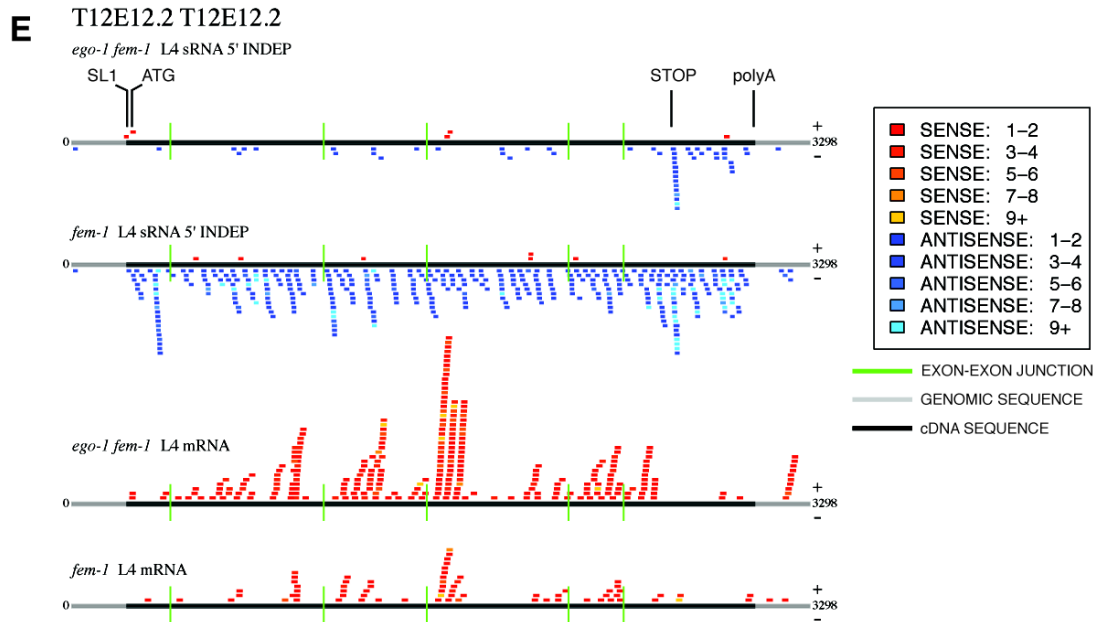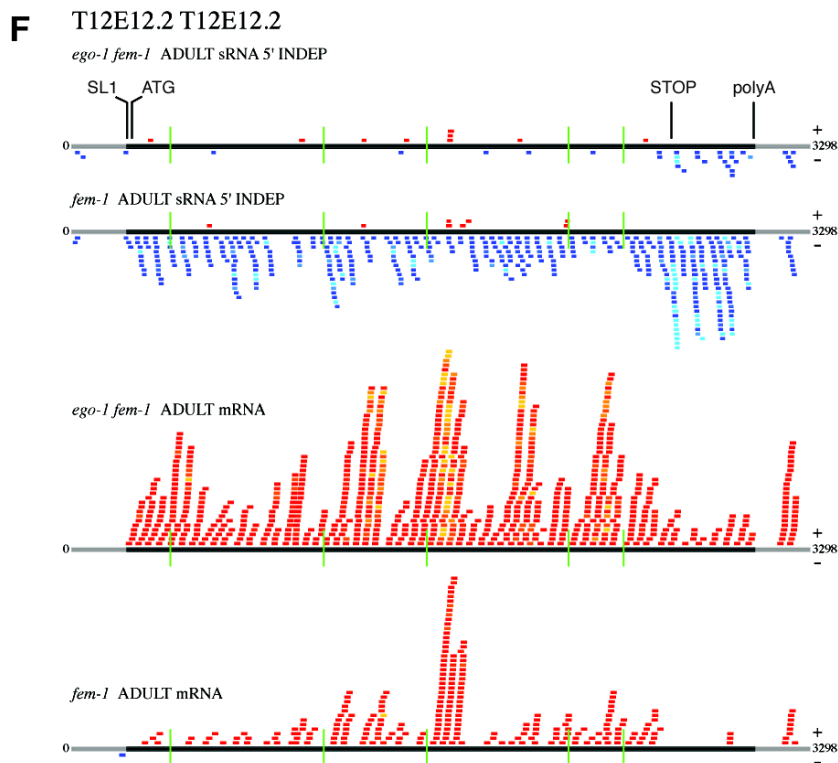

**Supplementary Figure 3. Small RNA and mRNA sequencing reads of *klp-7*, *mes-6*, T12E12.2.** Sense (shades of red) and antisense (shades of blue) reads of 5'-independent small RNAs and mRNA [experimental: *ego-1(om84) fem-1(hc17)* and control: *fem-1(hc17)*] mapped to spliced transcripts. **(A)** *klp-7* - L4-staged animals. **(B)** *klp-7* - Adult-staged animals. **(C)** *mes-6* - L4-staged animals. **(D)** *mes-6* - Adult-staged animals. **(E)** T12E12.3 - L4-staged animals. **(F)** T12E12.2 - Adult-staged animals.

#### SUPP FIGURE 4

|           |         |                                      |           |
|-----------|---------|--------------------------------------|-----------|
| Y45F10A.2 | mRNA    | TCTGTGAATAAAGAATTTACAAACTCCAGAAAAA   |           |
|           | genomic | TCTGTGAATAAAGAATTTACAAACTCCAGATTAA   |           |
|           | sRNA    | ATTTACAAACTCCAGAAAAA                 | (1 count) |
| F48E8.5   | mRNA    | TTTTTTTGCAGAATAAAAGGTCATCGTCTAAAAA   |           |
|           | genomic | TTTTTTTGCAGAATAAAAGGTCATCGTCTATTATG  |           |
|           | sRNA    | GAATAAAAGGTCATCGTCTAAAA              | (2)       |
| T09A5.10  | mRNA    | GATCGCTGAGAAATGAAGAAGTTTCTTATTAAAAA  |           |
|           | genomic | GATCGCTGAGAAATGAAGAAGTTTCTTATTTTTAT  |           |
|           | sRNA    | AAATGAAGAAGTTTCTTATTAAAA             | (1)       |
| K07A12.2  | mRNA    | TGGAGGACGAAACGGTCCTTCGAATTTGTAAAAA   |           |
|           | genomic | TGGAGGACGAAACGGTCCTTCGAATTTGTAAACAG  |           |
|           | sRNA    | CGGTCCCTTCGAATTTGTAAAAA              | (1)       |
| T05G5.3   | mRNA    | TTTTCACACCGCGATAAATAAATTCGCTCTAAAAA  |           |
|           | genomic | TTTTCACACCGCGATAAATAAATTCGCTCTACTTTC |           |
|           | sRNA    | GATAAATAAATTCGCTCTAAAA               | (1)       |
| Y4C6B.1   | mRNA    | TCAATTCATTTTCAATAAACATTTTGTATAAAAA   |           |
|           | genomic | TCAATTCATTTTCAATAAACATTTTGTATAGTAA   |           |
|           | sRNA    | TCAATAAACATTTTGTATAAAA               | (1)       |
| C14B9.4B  | mRNA    | AGTCCCACGAAATAAAACGTACCGATGATTAAAAA  |           |
|           | genomic | AGTCCCACGAAATAAAACGTACCGATGATTATTAAA |           |
|           | sRNA    | GAAATAAAACGTACCGATGATTAAA            | (1)       |
| ZK1055.1  | mRNA    | TAGGGTCAGAATAAACGGGTTTTTAAATTTAAAAA  |           |
|           | genomic | TAGGGTCAGAATAAACGGGTTTTTAAATTTATCAAC |           |
|           | sRNA    | TAAACGGGTTTTTAAATTTAAAAA             | (1)       |
|           | sRNA    | AAACGGGTTTTTAAATTTAAAAA              | (1)       |
| T03F6.1   | mRNA    | TCATTTGTCCATAAAGCTTGTGATGTTTTAAAAA   |           |
|           | genomic | TCATTTGTCCATAAAGCTTGTGATGTTTTAAGTAA  |           |
|           | sRNA    | AAGCTTGTGATGTTTTAAAA                 | (1)       |

**Supplementary Figure 4. Small RNAs that span mRNA-polyA junctions.** We found 10 independent small RNAs (antisense to 9 putative EGO-1 targets) that span the 3'UTR-polyA junction in *fem-1(hc17)* control samples. Each of these contained the 3' linker sequence downstream of the nucleotides shown, with each defined by reads with Illumina GA2 quality scores of at least 32 (on a -5 to 40 scale). No mRNA-polyA junction RNAs for putative L4/Adult EGO-1 targets were found in experimental *ego-1(om84); fem-1(hc17)* animals. The polyadenylation signal has been underlined for each gene.

**SUPP FIGURE 5**

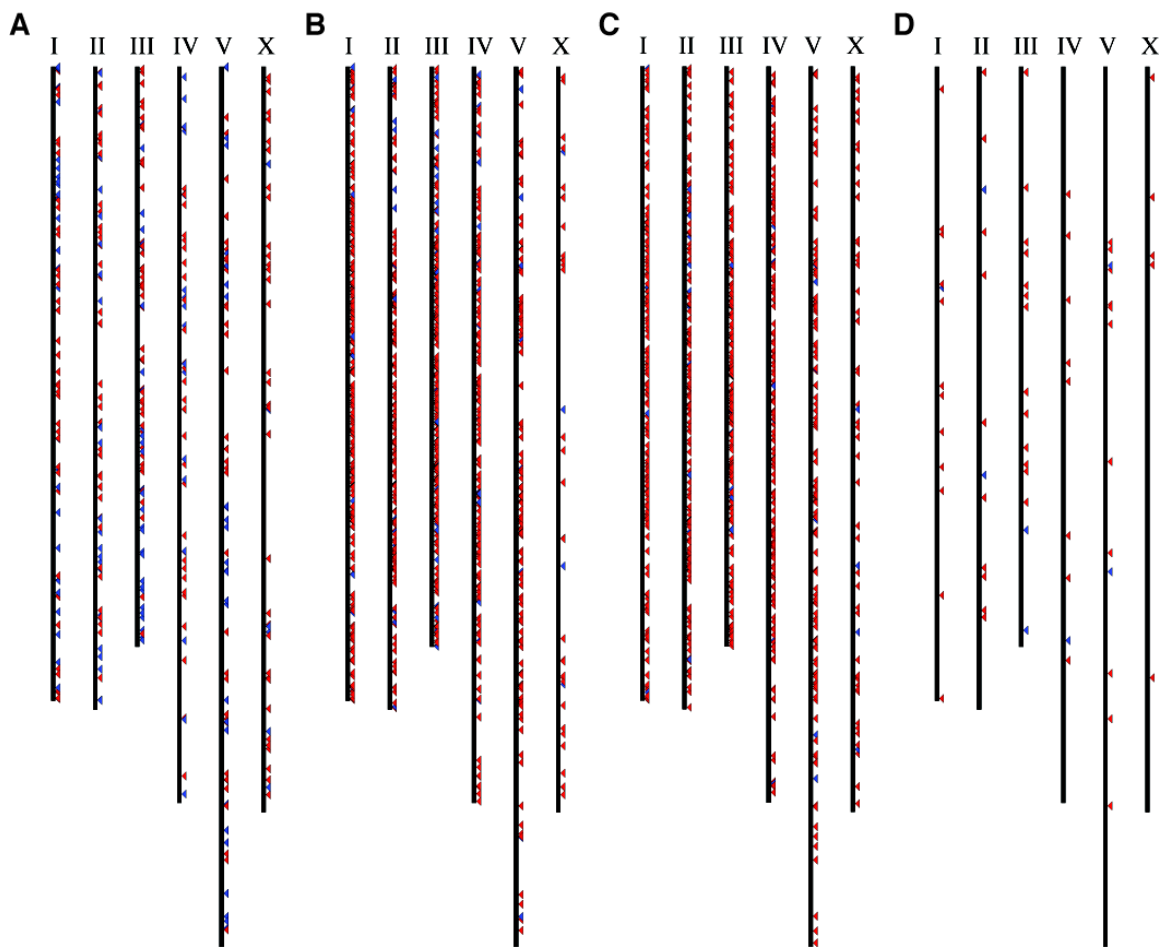

**Supplementary Figure 5. Chromosomal positions of EGO-1 targets.** Chromosome size and gene positions are drawn to scale. **(A)** L3. Genes whose small RNA abundance is decreased 2-fold [red, DOWN] or increased 2-fold [blue, UP] in *ego-1(om84)* relative to *ego-1(+)* with a posterior probability ratio [PPR] < 0.005. [I] 41 genes DOWN, 30 genes UP. [II] 47 genes DOWN, 27 genes UP. [III] 50 genes DOWN, 31 genes UP. [IV] 32 genes DOWN, 20 genes UP. [V] 36 genes DOWN, 31 genes UP. [X] 37 genes DOWN, 6 genes UP. **(B)** L4. Genes whose small RNA abundance is decreased 3-fold [red, DOWN] or increased 3-fold [blue, UP] in *ego-1(om84)* relative to *ego-1(+)* with a [PPR] < 0.005. [I] 262 genes DOWN, 20 genes UP. [II] 190 genes DOWN, 26 genes UP. [III] 247 genes DOWN, 34 genes UP. [IV] 192 genes DOWN, 18 genes UP. [V] 142 genes DOWN, 13 genes UP. [X] 33 genes DOWN, 4 genes UP. **(C)** Adult. Genes whose small RNA abundance is decreased 3-fold [red, DOWN] or increased 3-fold [blue, UP] in *ego-1(om84)* relative to *ego-1(+)* with a [PPR] < 0.005. [I] 186 genes DOWN, 6 genes UP. [II] 165 genes DOWN, 13 genes UP. [III] 188 genes DOWN, 10 genes UP. [IV] 163 genes DOWN, 10 genes UP. [V] 127 genes DOWN, 8 genes UP. [X] 51 genes DOWN, 4 genes UP. **(D)** L3, L4, and adult. Genes whose small RNA abundance is decreased 3-fold [red, DOWN] or increased 3-fold [blue, UP] in *ego-1(om84)* relative to *ego-1(+)* with a [PPR] < 0.005 (2-fold in L3. [I] 12 genes DOWN, 1 genes UP. [II] 10 genes DOWN, 2 genes UP. [III] 14 genes DOWN, 2 genes UP. [IV] 8 genes DOWN, 1 gene UP. [V] 11 genes DOWN, 2 genes UP. [X] 5 genes DOWN, 0 genes UP. We found only 33 putative EGO-1 targets (of 1066 total targets) to be on the X chromosome in L4 datasets (p-value  $\sim 7.83 \times 10^{-34}$ ). We also found that only 51 putative EGO-1 targets (880 total) to be on the X chromosome in adult datasets (p-value  $\sim 5.35 \times 10^{-15}$ ).

Correcting for multiple hypotheses, we found that EGO-1 targets are significantly underrepresented on the X chromosome.



SUPP FIGURE 6

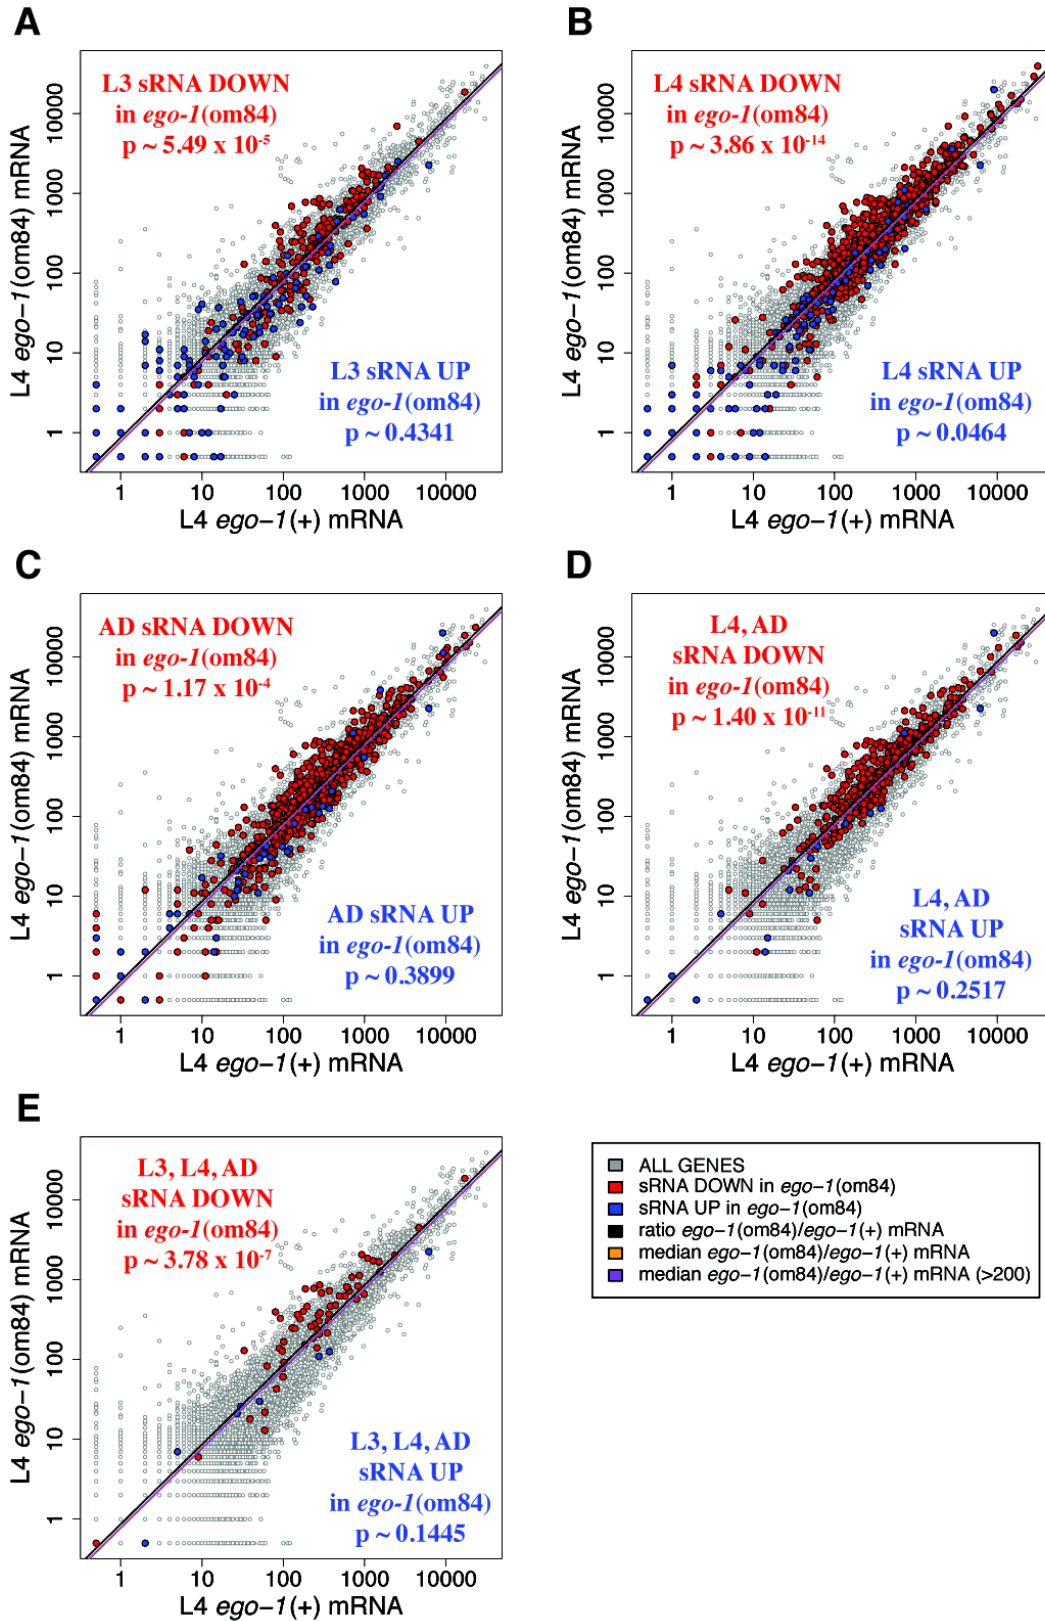

SUPP FIGURE 6 (cont.)

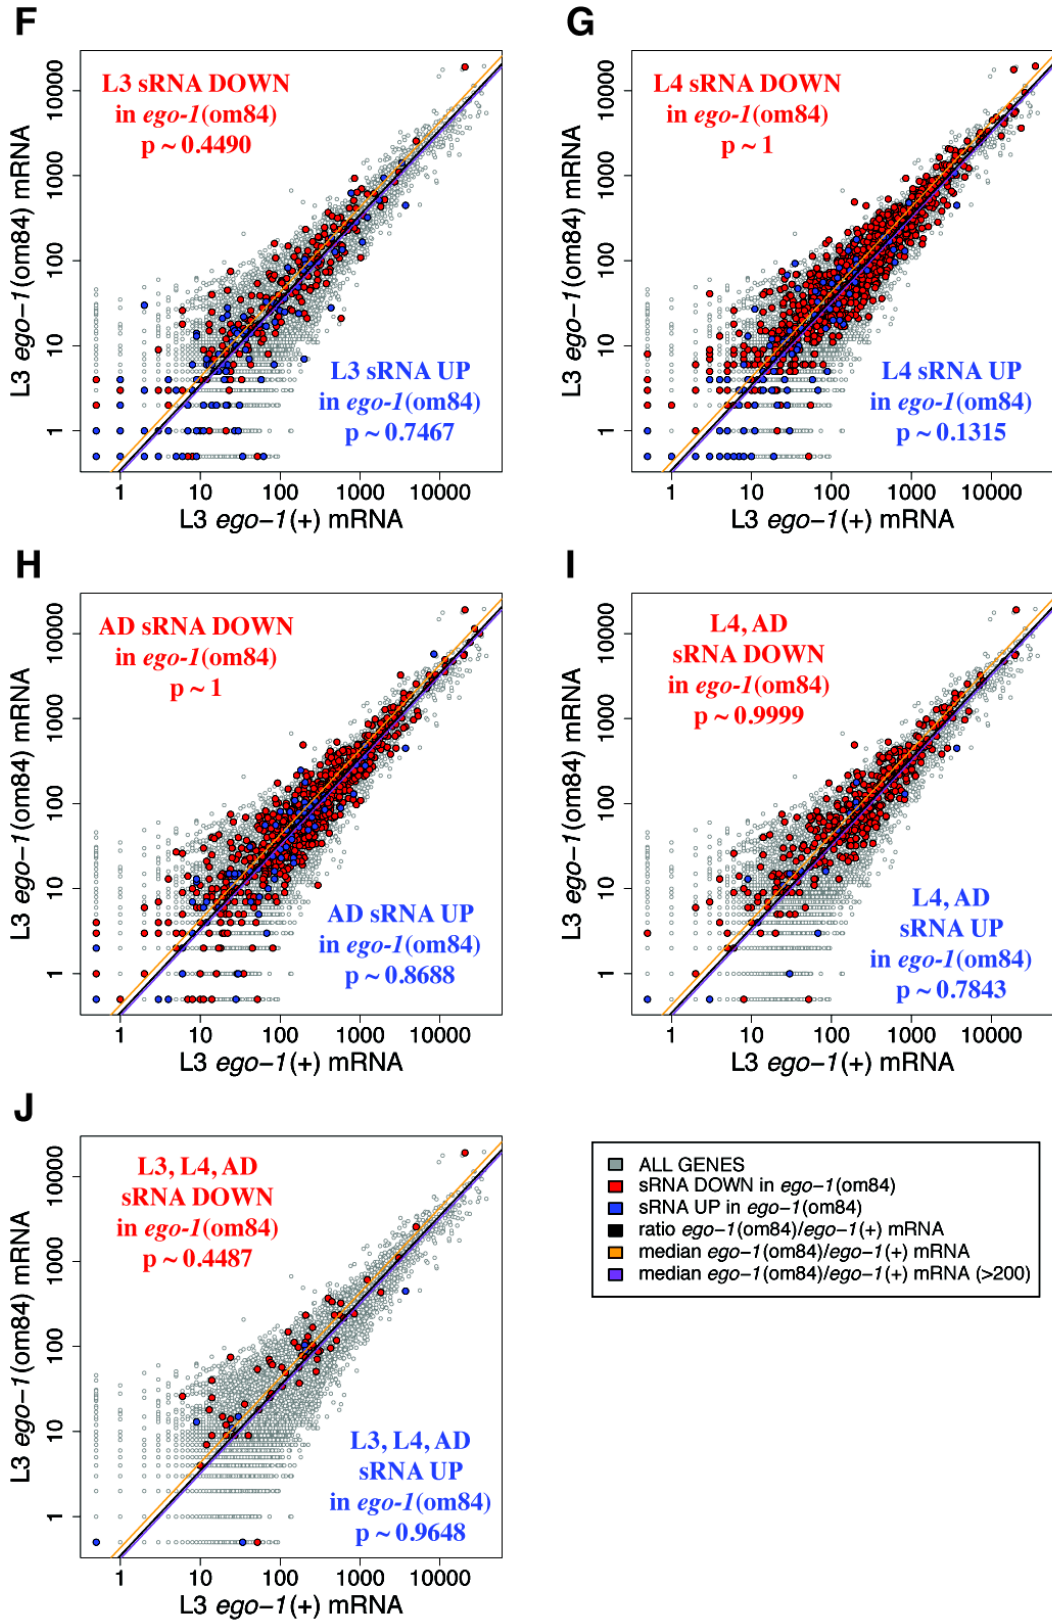

**Supplementary Figure 6. Summary of L4 and L3 mRNA abundance.** Scatter plots depict a gene-by-gene comparison of mRNA abundance in staged L4 and L3 animals (gray), and highlighted are genes whose sRNA abundance is down in *ego-1(om84)* (red) and genes whose sRNA abundance is up in *ego-1(om84)* (blue). As the key question for these data was the existence of an inverse relationship between small RNA (sRNA) and mRNA abundance, a central aspect of the data is the median values of the ratio of mRNA levels in *ego-1(om84)*/mRNA levels in *ego-1(+)*. Two median lines are shown for each dataset: (i) median of the ratio of *ego-1(om84)*/*ego-1(+)* on a gene-by-gene basis (ii) median of the ratio of *ego-1(om84)*/*ego-1(+)* on a gene-by-gene basis using only those genes for which the sum of *ego-1(om84)* and *ego-1(+)* counts is greater than 200. A black line shows the total ratio of total counts in each pair of samples giving the expected parity between samples. Gene counts summary: **(A)** L4 mRNA: Changes in L3 sRNA abundance: 243 genes down 2-fold (red, p-value  $\sim 5.49 \times 10^{-5}$ ) and 145 genes up 2-fold (blue, p  $\sim 0.4341$ ). **(B)** L4 mRNA: Changes in L4 sRNA abundance: 1066 genes down 3-fold (red, p-value  $\sim 3.86 \times 10^{-14}$ ) and 115 genes up 3-fold (blue, p  $\sim 0.0464$ ). **(C)** L4 mRNA: Changes in adult sRNA abundance: 880 genes down 3-fold (red, p-value  $\sim 1.17 \times 10^{-4}$ ) and 51 genes up 3-fold (blue, p  $\sim 0.3899$ ). **(D)** L4 mRNA: Changes in L4 and adult sRNA abundance: 437 genes down 3-fold (red, p-value  $\sim 1.40 \times 10^{-11}$ ) and 20 genes up 3-fold (blue, p  $\sim 0.2517$ ). **(E)** L4 mRNA: Changes in L3, L4, and adult sRNA abundance: 60 genes down 2-fold in L3 and 3-fold in L4 and adult (red, p-value  $\sim 3.78 \times 10^{-7}$ ) and 115 genes up (blue, p  $\sim 0.1445$ ). **(F)** L3 mRNA: Changes in L3 sRNA abundance: 243 genes down 2-fold (red, p-value  $\sim 0.4490$ ) and 145 genes up 2-fold (blue, p  $\sim 0.7467$ ). **(G)** L3 mRNA: Changes in L4 sRNA abundance: 1066 genes down 3-fold

(red, p-value ~ 1) and 115 genes up 3-fold (blue, p ~ 0.1315). **(H)** L3 mRNA: Changes in adult sRNA abundance: 880 genes down 3-fold (red, p-value ~ 1) and 51 genes up 3-fold (blue, p ~ 0.8688). **(I)** L3 mRNA: Changes in L4 and adult sRNA abundance: 437 genes down 3-fold (red, p-value ~ 0.9999) and 20 genes up 3-fold (blue, p ~ 0.7843). **(J)** L3 mRNA: Changes in L3, L4, and adult sRNA abundance: 60 genes down 2-fold in L3 and 3-fold in L4 and adult (red, p-value ~ 0.4487) and 115 genes up (blue, p ~ 0.9648).

## **SUPP TABLE 1**

**Attached as EXCEL file: ego-1\_sRNA\_L4\_AD\_table.xls**

**Supplementary Table 1. EGO-1 small RNA targets in L4 and adult worms.** 437 genes were found to have at least 3-fold fewer small RNAs (posterior probability < 0.005) in L4 and adult *ego-1(om84)* worms. 20 genes were found to have at least 3-fold more small RNAs (posterior probability < 0.005) in L4 and adult *ego-1(om84)* worms.

## **SUPP TABLE 2**

**Attached as EXCEL file: ego-1\_sRNA\_L3\_L4\_AD\_table.xls**

**Supplementary Table 2. EGO-1 small RNA targets in L3, L4, and adult worms.** 60 genes were found to have at least 3-fold fewer small RNAs in L4 and adult and at least 2-fold fewer small RNAs in L3 (posterior probability < 0.005) in *ego-1(om84)* worms. 8 genes were found to have at least 3-fold more small RNAs in L4 and adult and at least 2-fold fewer more RNAs in L3 (posterior probability < 0.005) in *ego-1(om84)* worms.

## SUPP TABLE 3

Attached as EXCEL file: [ego-1\\_sRNA\\_L4\\_AD\\_table\\_less\\_stringent.xls](#)

**Supplementary Table 3. EGO-1 small RNA targets in L4 and adult worms.** Using only 2 adult sample pairs (JMM-cel-009/012 and JMM-cel-011/014) we found 965 genes to have at least 3-fold fewer small RNAs (posterior probability < 0.005) in L4 and adult *ego-1(om84)* worms. We found 35 genes to have at least 3-fold more small RNAs (posterior probability < 0.005) in L4 and adult *ego-1(om84)* worms.

## EXPERIMENTAL PROCEDURES

### Worm strains

N2

PD8811 *ego-1(om84) unc-29(e193)/hT2[qIS48] I; +/hT2[qIS48] III*

PD8813 *ego-1(om84) unc-29(e193)/ccls4251 egl-31(n472) I*

PD8826 *ego-1(om84) unc-29(e193)/hT2[qIS48] I; +/hT2[qIS48] III ; fem-1(hc17)*

IV

PD8827 *unc-29(e193) I; fem-1(hc17) IV*

BA17 *fem-1(hc17) IV*

CB193 *unc-29(e193) I*

EL391 *ego-1(om84) unc-29(e193)/hT2[dpy-18(h662)] I; +/hT2[bli-4(e937)] III*

### Worm growth, synchronization and isolation

All strains used in sRNA and mRNA sequencing were synchronized by treating gravid adults with a 5.25% hypochlorite solution to kill all stages except embryos. Embryos were grown on enriched-peptone plates (20 g/L) at 25°C to L3, L4 and adult stages. *ego-1(-) unc-29(-) fem-1(-)* mutant and *unc-29(-) fem-1(-)* control animals were isolated by treating synchronized populations of PD8826 and PD8827 with a 2mM levamisole solution for 10 minutes. The animals were then placed on the non-seeded half of an enriched-peptone plate half-seeded with *E. coli* OP50. The worms were allowed to chemotax for 2-4 hours and motile *unc-29(-)* animals were harvested.

## **RNA capture and sequencing**

### **sRNA**

Small RNA (sRNA) was extracted from frozen tissue with the mirVana miRNA Isolation Kit (Ambion). Small RNA libraries were created using a protocol similar to previous miRNA [1, 2] and sRNA capture procedures. All RNA from mirVana isolation was ligated to either Linker-1 or Linker-2 (IDT) in the absence of ATP with T4 RNA ligase 1 (New England Biolabs). Ligated RNA was size selected (38-46nt DNA/RNA hybrid) on 12% PAGE and treated with Antarctic phosphatase (New England Biolabs) to remove all phosphates from the 5' end. The RNA was then treated with T4 polynucleotide kinase (T4 PNK, New England Biolabs) to phosphorylate hydroxylated 5' ends. The 5' ends of T4 PNK-treated RNA were ligated to barcoded adapters as previously described [1]. Dual-ligated RNA was reverse transcribed, PCR amplified and size selected on

4% NuSieve (Lonza) agarose. All sequencing was performed on the Illumina/GAII platform. The following oligos were used:

3' adapters (5' adenylation, 3' dideoxyC):

IDT Linker-1 – rAppCTGTAGGCACCATCAATC

IDT Linker-2 – rAppCACTCGGGCACCAAGGAC

5' adapters (i.e. AF-PP-339, 4nt barcode at 3' end):

/5AmMC6/ ACGCTCTTCCGATCTrArCrUrU

RT oligos:

AF-JX-9 (reverse complement of IDT Linker-1) –

ATTGATGGTGCCTACAC

AF-JX-73 (reverse complement of IDT Linker-2) –

TCCTTGGTGCCCGAGTG

PCR oligos:

AF\_WOL\_SOL\_FWD –

GATACGGCGACCACCGAGATCTACACTCTTTCCCTACACGACGCTCTTCCG  
ATCT

AF\_WOL\_SOL\_REV (for use with IDT Linker-1) –

CAAGCAGAAGACGGCATAACGAGCTCTTCCGATCTATTGATGGTGCCTACAG

AF\_WOL\_SOL\_REV\_2 (for use with IDT Linker-2) –

CAAGCAGAAGACGGCATAACGAGCTCTTCCGATCTTCCTTGGTGCCCGAGTG

**mRNA**

mRNA sequencing libraries were prepared using a similar protocol to that of sRNA libraries. High molecular weight (HMW, >200nt) RNA was isolated from frozen tissues with the mirVana miRNA Isolation Kit (Ambion). PolyA(+) RNA was selected from HMW RNA with the MicroPoly(A) Purist Kit (Ambion). The polyA(+) mRNA was then fragmented to 100-200nt using RNA Fragmentation Reagents (Ambion). Because fragmentation creates ends (5'-OH, 3'/2'-P) incompatible with the dual-ligation system, the mRNA was treated with T4 PNK in the presence of ATP to create monophosphorylated 5' and hydroxylated 3' ends. The ATP was then removed with illustra Microspin G-25 columns (GE Healthcare) in order to perform ATP-free 3' adapter ligation. 3' and 5' linker ligations, reverse transcription, and PCR were performed as described above. Libraries were size selected on 2% agarose (Invitrogen).

### **Sequence processing**

Sequencing reads (36nt) for all libraries were generated using the Illumina Genome Analyzer II. Custom Perl scripts were used to identify and remove the 4nt barcode from the 5' end (sRNA and mRNA) and either the linker from the 3' end (sRNA) or the four 3' most bases (mRNA). All sequences were aligned to the *C. elegans* genome and transcriptome (Wormbase release WS190) using BLAT [3] alignment software (sRNA: stepSize=4, tileSize=8; mRNA: stepSize=5, tileSize=11). Sequences were required to meet one of two criteria for inclusion in this study:



1) (a) align perfectly for their whole length (b) be unique to both the genome and transcriptome.

2) align perfectly and uniquely to the transcriptome for their whole length and not align to the genome.

# SUPP METHODS TABLE 1

| unique_ID   | 5' BARCODE | 3' Linker | AF SOL          | genotype                | stage | RNA  | cloning protocol | ALL reads with BC and linker | miR     | 21U    | SENSE    | ANTISENSE |
|-------------|------------|-----------|-----------------|-------------------------|-------|------|------------------|------------------------------|---------|--------|----------|-----------|
| JMM-cel-001 | TTCT       | Linker-2  | AF SOL_264 TTCT | ego-1(om84) fem-1(hc17) | L3    | SRNA | AP-PNK           | 2872989                      | 117851  | 1325   | 26626    | 125126    |
| JMM-cel-002 | TTCT       | Linker-2  | AF SOL_301 ATAC | ego-1(om84) fem-1(hc17) | L3    | SRNA | AP-PNK           | 3566905                      | 479915  | 1707   | 29795    | 82924     |
| JMM-cel-003 | GCAG       | Linker-2  | AF SOL_264 GCAG | fem-1(hc17)             | L3    | SRNA | AP-PNK           | 3565186                      | 308301  | 3236   | 66338    | 364003    |
| JMM-cel-004 | GCAG       | Linker-2  | AF SOL_281 GCAG | fem-1(hc17)             | L3    | SRNA | AP-PNK           | 3167729                      | 474756  | 3767   | 63452    | 446379    |
| JMM-cel-005 | CAAT       | Linker-2  | AF SOL_230 CAAT | ego-1(om84) fem-1(hc17) | L4    | SRNA | AP-PNK           | 4181720                      | 819830  | 45882  | 72740    | 377999    |
| JMM-cel-006 | CAAT       | Linker-2  | AF SOL_285 CAAT | ego-1(om84) fem-1(hc17) | L4    | SRNA | AP-PNK           | 4862322                      | 179732  | 10236  | 142532   | 408828    |
| JMM-cel-007 | TTCT       | Linker-2  | AF SOL_230 TTCT | fem-1(hc17)             | L4    | SRNA | AP-PNK           | 7317807                      | 1301154 | 10236  | 142532   | 1165311   |
| JMM-cel-008 | ATAC       | Linker-2  | AF SOL_265 ATAC | fem-1(hc17)             | L4    | SRNA | AP-PNK           | 5116231                      | 821383  | 32094  | 75328    | 660187    |
| JMM-cel-009 | GTTA       | Linker-2  | AF SOL_119 GTTA | ego-1(om84) fem-1(hc17) | AD    | SRNA | AP-PNK           | 2213814                      | 68437   | 12868  | 25081    | 598044    |
| JMM-cel-010 | AAGA       | Linker-2  | AF SOL_241 AAGA | ego-1(om84) fem-1(hc17) | AD    | SRNA | AP-PNK           | 1470658                      | 717     | 2051   | 19584    | 271232    |
| JMM-cel-011 | TGAA       | Linker-2  | AF SOL_244 TGAA | ego-1(om84) fem-1(hc17) | AD    | SRNA | AP-PNK           | 6234606                      | 528019  | 67042  | 93600    | 2131011   |
| JMM-cel-012 | TATG       | Linker-1  | AF SOL_119 TATG | fem-1(hc17)             | AD    | SRNA | AP-PNK           | 1663607                      | 43052   | 3523   | 18348    | 547776    |
| JMM-cel-013 | TGAA       | Linker-2  | AF SOL_241 TGAA | fem-1(hc17)             | AD    | SRNA | AP-PNK           | 811775                       | 649     | 108    | 16778    | 226330    |
| JMM-cel-014 | AAGA       | Linker-2  | AF SOL_244 AAGA | fem-1(hc17)             | AD    | SRNA | AP-PNK           | 6308433                      | 511812  | 15873  | 128574   | 1711739   |
| JMM-cel-015 | AAGA       | Linker-2  | AF SOL_270 AAGA | ego-1(om84) fem-1(hc17) | L3    | SRNA | RNAseq           | 2754545                      | -       | -      | 1037801  | 2253      |
| JMM-cel-016 | TATG       | Linker-2  | AF SOL_286 TATG | ego-1(om84) fem-1(hc17) | L3    | SRNA | RNAseq           | 4776595                      | -       | -      | 951766   | 4473      |
| JMM-cel-017 | ACTT       | Linker-2  | AF SOL_270 ACTT | fem-1(hc17)             | L3    | SRNA | RNAseq           | 5931359                      | -       | -      | 4134137  | 13148     |
| JMM-cel-018 | ACTT       | Linker-2  | AF SOL_286 ACTT | fem-1(hc17)             | L3    | SRNA | RNAseq           | 5478481                      | -       | -      | 1612666  | 4089      |
| JMM-cel-019 | ATAC       | Linker-2  | AF SOL_239 ATAC | ego-1(om84) fem-1(hc17) | L4    | SRNA | RNAseq           | 7812141                      | -       | -      | 3484807  | 2718      |
| JMM-cel-020 | TGAA       | Linker-2  | AF SOL_271 TGAA | ego-1(om84) fem-1(hc17) | L4    | SRNA | RNAseq           | 3482947                      | -       | -      | 1318708  | 2718      |
| JMM-cel-021 | TATG       | Linker-2  | AF SOL_239 TATG | fem-1(hc17)             | L4    | SRNA | RNAseq           | 7654390                      | -       | -      | 3713808  | 15390     |
| JMM-cel-022 | TTCT       | Linker-2  | AF SOL_271 TTCT | ego-1(om84) fem-1(hc17) | L4    | SRNA | RNAseq           | 2687587                      | -       | -      | 18857432 | 2836      |
| JMM-cel-023 | ATAC       | Linker-1  | AF SOL_132 ATAC | ego-1(om84) fem-1(hc17) | AD    | SRNA | RNAseq           | 3613507                      | -       | -      | 765757   | 7143      |
| JMM-cel-024 | GCAG       | Linker-1  | AF SOL_132 GCAG | ego-1(om84) fem-1(hc17) | AD    | SRNA | RNAseq           | 3091292                      | -       | -      | 599272   | 6895      |
| JMM-cel-025 | GCAG       | Linker-2  | AF SOL_201 GCAG | ego-1(om84) fem-1(hc17) | AD    | SRNA | RNAseq           | 5263220                      | -       | -      | 2527019  | 7017      |
| JMM-cel-026 | GCAG       | Linker-2  | AF SOL_204 GCAG | ego-1(om84) fem-1(hc17) | AD    | SRNA | RNAseq           | 4894860                      | -       | -      | 2449654  | 6734      |
| JMM-cel-027 | CAAT       | Linker-1  | AF SOL_132 CAAT | fem-1(hc17)             | AD    | SRNA | RNAseq           | 2721578                      | -       | -      | 631034   | 1396      |
| JMM-cel-028 | TTCT       | Linker-1  | AF SOL_132 TTCT | fem-1(hc17)             | AD    | SRNA | RNAseq           | 3428679                      | -       | -      | 981389   | 1749      |
| JMM-cel-029 | ATAC       | Linker-2  | AF SOL_201 ATAC | fem-1(hc17)             | AD    | SRNA | RNAseq           | 4599831                      | -       | -      | 2040180  | 5352      |
| JMM-cel-030 | ATAC       | Linker-2  | AF SOL_204 ATAC | fem-1(hc17)             | AD    | SRNA | RNAseq           | 5877152                      | -       | -      | 2498616  | 6227      |
| JMM-cel-031 | TATG       | Linker-2  | AF SOL_202 TATG | ego-1(om84) fem-1(hc17) | AD    | SRNA | SP-DEP           | 5786238                      | 2950678 | 190198 | 45504    | 52110     |
| JMM-cel-032 | TATG       | Linker-2  | AF SOL_203 TATG | ego-1(om84) fem-1(hc17) | AD    | SRNA | SP-DEP           | 3049557                      | 1587112 | 109273 | 26496    | 30888     |
| JMM-cel-033 | TGAA       | Linker-2  | AF SOL_205 TGAA | ego-1(om84) fem-1(hc17) | AD    | SRNA | SP-DEP           | 2452743                      | 1279815 | 169415 | 17359    | 51494     |
| JMM-cel-034 | TGAA       | Linker-2  | AF SOL_206 TGAA | ego-1(om84) fem-1(hc17) | AD    | SRNA | SP-DEP           | 3092167                      | 1613987 | 247329 | 22883    | 66673     |
| JMM-cel-035 | ACTT       | Linker-2  | AF SOL_202 ACTT | fem-1(hc17)             | AD    | SRNA | SP-DEP           | 4947750                      | 2554605 | 58312  | 59749    | 142984    |
| JMM-cel-036 | ACTT       | Linker-2  | AF SOL_205 ACTT | fem-1(hc17)             | AD    | SRNA | SP-DEP           | 4134210                      | 2247560 | 51316  | 53631    | 125872    |
| JMM-cel-037 | AAGA       | Linker-2  | AF SOL_203 AAGA | fem-1(hc17)             | AD    | SRNA | SP-DEP           | 4232670                      | 2245104 | 66106  | 42682    | 127256    |
| JMM-cel-038 | AAGA       | Linker-2  | AF SOL_206 AAGA | fem-1(hc17)             | AD    | SRNA | SP-DEP           | 3670612                      | 1953736 | 60959  | 37528    | 114345    |

**Supplementary Methods Table 1. Summary of *ego-1* sequencing.** Strains and cloning strategy details can be found in Methods. AP-PNK: Antarctic phosphatase and T4 polynucleotide kinase-treated; 5P-DEP: 5'-monophosphate-dependent; BC: barcode. Counts for miR, 21U, SENSE and ANTISENSE (cDNA) are total sequencing reads that match perfectly to the appropriate reference data set.

**SUPP METHODS TABLE 2**

| GEO accession #/FIRE_name | genotype                                                          | raw reads | reads with 3' linker | SENSE | ANTISENSE |
|---------------------------|-------------------------------------------------------------------|-----------|----------------------|-------|-----------|
| GSM454000                 | CSR-1:IP                                                          | 3850599   | 2483976              | 33358 | 741579    |
| GSM454001                 | control animals for CSR-1:IP                                      | 4992022   | 3873256              | 25496 | 528234    |
| GSM454002                 | <i>csr-1(tm892)</i>                                               | 5139346   | 4041500              | 67567 | 713287    |
| GSM454003                 | <i>ego-1(om97)</i>                                                | 5064237   | 2603976              | 51010 | 290730    |
| GSM454004                 | DA1316                                                            | 5903016   | 4586212              | 47962 | 753452    |
| GSM455387                 | control animals for <i>dth-3(ne4253)</i> and <i>ekl-1(tm1599)</i> | 3059030   | 2197574              | 13655 | 330312    |
| GSM455388                 | control animals for <i>dth-3(ne4253)</i> and <i>ekl-1(tm1599)</i> | 3070842   | 2254729              | 17255 | 430275    |
| GSM455389                 | <i>dth-3(ne4253)</i>                                              | 5088634   | 3381777              | 34860 | 46589     |
| GSM455390                 | <i>dth-3(ne4253)</i>                                              | 5029803   | 3402272              | 42948 | 56058     |
| GSM455403                 | <i>ekl-1(tm1599)</i>                                              | 5529284   | 2977832              | 70776 | 43025     |
| GSM503821                 | N2 (for <i>rf-3; rf-1; eri-1</i> )                                | 1863263   | 1647270              | 25554 | 539837    |
| GSM503822                 | N2 (for <i>dcr-1; ergo-1</i> )                                    | 2191221   | 1664919              | 40215 | 237917    |
| GSM503823                 | <i>rf-3(pk1426)</i>                                               | 2466605   | 1830800              | 26048 | 648524    |
| GSM503824                 | <i>rf-3(pk1426)</i>                                               | 2512391   | 2301267              | 42323 | 1028592   |
| GSM503825                 | <i>rf-1(pk1417)</i>                                               | 2928625   | 2377106              | 40592 | 904420    |
| GSM503828                 | <i>eri-1(mg366)</i>                                               | 1590129   | 1396626              | 29135 | 484562    |
| GSM503830                 | <i>ergo-1(gg098)</i>                                              | 3393918   | 2544374              | 93163 | 317863    |
| GSM503831                 | <i>dcr-1(mg375)</i>                                               | 3883979   | 3243322              | 79126 | 398993    |
| AF_SOL_287_AGCG           | N2 (for <i>rde-1; rde-4; rf-1 glp-4; WMM126</i> )                 | 4514797   | 3495900              | 53079 | 1201514   |
| AF_SOL_287_ACTT           | <i>rde-1(ne300)</i>                                               | 4317957   | 3178834              | 84542 | 1017400   |
| AF_SOL_287_CGTC           | <i>rde-4(ne299)</i>                                               | 4459362   | 3134550              | 44443 | 965045    |
| AF_SOL_287_CTGG           | <i>rf-1(pk1417) glp-4(bn2)</i>                                    | 4893019   | 3585787              | 95365 | 150559    |
| AF_SOL_288_GGGT           | MAGO (WMM126)                                                     | 4035150   | 2072460              | 42855 | 371165    |

**Supplementary Methods Table 2. Summary of referenced sequencing.** Referenced sequences: name, genotype, number of raw reads, reads with 3' linker. SENSE and ANTISENSE (cDNA) are total sequencing reads that match perfectly to the appropriate reference data set.

## **Statistics**

### **RNA abundance differences**

A Bayesian model was used to determine P-values for sRNA and mRNA abundance levels. This model uses two hypotheses for P-value calculations. The first model assumes that two samples have the same probability for yielding a positive instance for a given gene and the second model assumes that each sample has a unique probability for yielding a positive instance for a given gene.

Given a gene in two samples:

Sample 1:  $P_1$  = positive instances for given gene,  $T_1$  = total instances (all genes) in sample

Sample 2:  $P_2$  = positive instances for given gene,  $T_2$  = total instances (all genes) in sample

Therefore, the estimated positive instance value for the first model is given by:

$$(P_1+P_2)/(T_1+T_2) = PC \text{ (combined probability)}$$

and the probability of the observed pattern is given by:

$$PROB_{1st} = [PC^{P_1}] * [PC^{P_2}] * [(1-PC)^{(T_1-P_1)}] * [(1-PC)^{(T_2-P_2)}].$$

The estimated positive instance values for the second model are given by:

$$\text{Sample 1: } P_1/T_1 = PC_1$$

$$\text{Sample 2: } P_2/T_2 = PC_2$$

and the probability of the observed pattern in the second model is given by:

$$\text{PROB}_{2\text{nd}} = [(PC_1^{P_1}) * (PC_2^{P_2})] * [(1-PC_1)^{(T_1-P_1)} * (1-PC_2)^{(T_2-P_2)}].$$

The final probability is given by:

$$\text{PROB}_{\text{final}} = \text{PROB}_{1\text{st}} / \text{PROB}_{2\text{nd}}.$$

### **Binomial distributions for UP or DOWN**

A median value of fold change was calculated for given stage-specific mRNA datasets. Genes whose sRNA abundance were calculated to be significantly different for a given stage were isolated in these mRNA datasets and binomial distributions were calculated for the total number of genes above and below the median value. One-tailed tests were used to determine the appropriate P-value because we had an expectation that genes whose sRNA abundance decreased in an *ego-1(-)* background would show an increase in the abundance of mRNA in an *ego-1(-)* background and vice versa.

### **Binomial distributions for RNAi mutants**

Five median values of the ratio of mutant to control were calculated:

- 1) all genes
- 2) only genes with mutant+control counts > 25

- 3) only genes with mutant+control counts > 200
- 4) using only genes with mean incidence >  $2.5 \times 10^{-4}$
- 5) using only genes with mean incidence >  $2.5 \times 10^{-5}$

\* Mean incidences were calculated as  $C_A/C_T + M_A/M_T$

( $C_A$  = counts for gene A in control,  $C_T$  = total counts for all genes in control,  $M_A$  = counts for gene A in mutant,  $M_T$  = total counts for all genes in mutant).

### **Binomial distribution for genomic location of EGO-1-dependent small RNAs**

Genome was divided into 100bp bins and the small RNA counts for each bin were tabulated and a fold-change between experimental and control samples was calculated. Examining the 40 bins with the largest fold-change between experimental and control animals, we found that 34 bins spanned an annotated exon. Using those bases that fall into exons throughout the genome, we calculated an observed frequency of bins that should span an annotated exon and from their calculated a binomial distribution for our 100bp bins.

### **Referenced sequences**

Sequences for *csr-1(tm892)* (GSM454002), *ego-1(om97)* (GSM454003), control animals (DA1316) for *csr-1(tm892)* and *ego-1(om97)* (GSM454004), CSR-1:IP (GSM454000), control animals for CSR-1:IP (GSM454001), were obtained from the Gene Expression Omnibus (GEO) [4] accession number GSE18165 [5].

Sequences for *drh-3(ne4253)* (GSM455389 and GSM455390), *ekl-1(tm1599)* (GSM455403), and control animals for *drh-3(ne4253)* and *ekl-1(tm1599)*

(GSM455387 and GSM455388) were obtained from GEO accession number GSE18215 [6]. Sequences for N2 (GSM503821, GSM503822), *rrf-3(pk1426)* (GSM503823, GSM503824), *rrf-1(pk1417)* (GSM503825), *eri-1(mg366)* (GSM503828), *dcr-1(mg375)* (GSM503831), and *ergo-1(gg098)* (GSM503830) were obtained from GEO accession number GSE19414 [7]. Sequences for *rde-1(ne300)*, *rde-4(ne299)*, *rrf-1(pk1417)* *glp-4(bn2)*, and MAGO (WM126) were obtained from Julia Pak (personal communication). Sequence information can be found in Supp Methods Table 2.

### **Accession numbers**

Illumina raw sequencing reads have been deposited in the NCBI Short Read Archive, accession numbers: GSE26579 (mRNA), GSE26580 (5'-monophosphate-dependent), GSE26581 (5'-monophosphate-independent). Sequence information can be found in Supp Methods Table 1.



## SUPPLEMENTARY REFERENCES

1. Gent, J. I., Schvarzstein, M., Villeneuve, A. M., Gu, S. G., Jantsch, V., Fire, A. Z., and Baudrimont, A. (2009). A *Caenorhabditis elegans* RNA-directed RNA polymerase in sperm development and endogenous RNA interference. *Genetics* 183, 1297-1314.
2. Lau, N. C., Lim, L. P., Weinstein, E. G., and Bartel, D. P. (2001). An abundant class of tiny RNAs with probable regulatory roles in *Caenorhabditis elegans*. *Science* 294, 858-862.
3. Kent, W. J. (2002). BLAT--the BLAST-like alignment tool. *Genome Res* 12, 656-664.
4. Edgar, R., Domrachev, M., and Lash, A. E. (2002). Gene Expression Omnibus: NCBI gene expression and hybridization array data repository. *Nucleic Acids Res* 30, 207-210.
5. Claycomb, J. M. et al. (2009). The Argonaute CSR-1 and its 22G-RNA cofactors are required for holocentric chromosome segregation. *Cell* 139, 123-134.
6. Gu, W. et al. (2009). Distinct argonaute-mediated 22G-RNA pathways direct genome surveillance in the *C. elegans* germline. *Mol. Cell* 36, 231-244.
7. Gent, J. I., Lamm, A. T., Pavelec, D. M., Maniar, J. M., Parameswaran, P., Tao, L., Kennedy, S., and Fire, A. Z. (2010). Distinct phases of siRNA synthesis in an endogenous RNAi pathway in *C. elegans* soma. *Mol. Cell* 37, 679-689.
